# PD-L1 expression and CD8+ tumor-infiltrating lymphocytes are associated with *ALK* rearrangement and clinicopathological features in inflammatory myofibroblastic tumors

Yoon Jin Cha<sup>1</sup> and Hyo Sup Shim<sup>1</sup>

<sup>1</sup> Department of Pathology, Severance Hospital, Yonsei University College of Medicine, Seoul, Korea

Correspondence to: Hyo Sup Shim, email: shimhs@yuhs.ac

Keywords: myofibroblastic tumor, inflammatory, anaplastic lymphoma kinase, PD-L1, lymphocyte, Pathology Section

Received: April 08, 2017

Accepted: July 12, 2017

Published: September 15, 2017

Copyright: Cha et al. This is an open-access article distributed under the terms of the Creative Commons Attribution License 3.0 (CC BY 3.0), which permits unrestricted use, distribution, and reproduction in any medium, provided the original author and source are credited.

## ABSTRACT

**Background:** Inflammatory myofibroblastic tumors (IMTs) are rare mesenchymal neoplasms that are composed of myofibroblastic cells accompanied by inflammatory infiltrate. We investigated the immune profiles of IMTs, including PD-L1 expression and proportion of CD8+ tumor-infiltrating lymphocytes (TILs), as well as its clinicopathological characteristics according to *ALK* gene rearrangement status.

**Methods:** Twenty-eight IMTs from 25 patients were retrieved from our pathology files (2005–2015), and their clinicopathological parameters and outcomes were analyzed. Immunohistochemistry (IHC) was performed using whole-tissue sections to detect PD-L1 and CD8 expression, and fluorescent in situ hybridization (FISH) analysis and IHC were performed using tissue microarrays to identify rearrangements in the *ALK*, *ROS1*, and *RET* genes.

**Results:** *ALK* rearrangement was observed in 11 cases (44.0%), and all cases exhibited diffuse cytoplasmic *ALK* expression during IHC. *ROS1* or *RET* rearrangement was not detected using IHC or FISH. IMTs harboring *ALK* rearrangement (*ALK*-positive) were located in the lungs ( $n = 7$ ), genitourinary tract ( $n = 2$ ), and mesentery ( $n = 1$ ). The mean patient age was 33.2 years for *ALK*-positive IMTs and 53.1 years for *ALK*-negative IMTs. All patients with *ALK*-positive IMTs survived without recurrence or metastasis. IMTs with metastasis and/or recurrence were *ALK*-negative and exhibited elevated PD-L1 expression (positive tumor cells: 70.0% vs. 21.3%,  $P = 0.023$ ; H-score: 107.5 vs. 26.3,  $P = 0.005$ ). In addition, *ALK*-negative IMTs had a more CD8+ TILs, compared to *ALK*-positive IMTs (23.3% vs. 8.9%,  $P = 0.027$ ).

**Conclusion:** *ALK*-positive IMTs are characterized by younger age, well-defined margins, frequent involvement of the lung, and fewer CD8+ TILs. Greater PD-L1 expression was observed in IMTs with tumor necrosis and metastasis/recurrence, which were also negative for *ALK* rearrangement. These results suggest that immune checkpoint inhibitors may be a novel option for treating patients with advanced IMT.

## INTRODUCTION

Inflammatory myofibroblastic tumors (IMT) are rare but distinctive mesenchymal neoplasms that are composed of myofibroblastic cells accompanied by inflammatory infiltrate. These tumors can occur at any anatomical site, but typically involve the lung, soft tissue, and viscera of children and young adults [1]. Approximately

half of IMTs harbor *ALK* gene rearrangement [2], and small subsets harbor kinase fusions, such as *ROS1*, *PDGFR $\beta$* , and *RET* [3, 4]. These kinase fusions could be therapeutically targeted using tyrosine kinase inhibitors, as patients with IMTs harboring *ALK* rearrangements (*ALK*-positive) experienced sustained partial response to an *ALK* inhibitor (crizotinib) [5]. Immune checkpoint inhibitors have also recently provided substantial

therapeutic activity in various tumors that express PD-L1 or have rich inflammatory components, such as malignant melanoma [6] and Hodgkin lymphoma [7]. The success of immunotherapy and interest in immune checkpoint inhibitors has led to research regarding PD-L1 and tumor-infiltrating lymphocytes (TILs) in various tumors. As IMTs are characterized by TILs, we hypothesized that the immune checkpoint pathway would be involved in a subset of IMTs, which could have therapeutic implications for patients with advanced IMT. The present study aimed to evaluate PD-L1 expression and CD8+ TILs in IMTs, as well as the clinicopathological characteristics of IMTs according to *ALK* status.

## RESULTS

### Patient characteristics

Twenty-eight IMTs from 25 patients were examined, and their clinicopathological profiles are summarized in Table 1. The patients included 13 men and 12 women, with a mean age of 44.3 years (range: 0-76 years). One patient died because of the disease, 3 patients experienced local recurrence and/or metastasis, and 4 patients were lost to follow-up. The lung was the most common site of involvement ( $n = 8$ ), and the genitourinary tract ( $n = 5$ ) was the most common extrapulmonary site. Most patients ( $n = 23$ ) underwent surgical resection and 2 patients were followed-up after the biopsy without further treatment. One patient received chemotherapy because of metastasis

and 1 patient received radiotherapy because of local recurrence.

### Clinicopathological findings according to *ALK* status

Eleven cases (42.3%) had *ALK* rearrangement, and expression of *ALK* during the IHC was associated with the *ALK* break-apart FISH results. All *ALK*-positive IMTs exhibited diffuse granular cytoplasmic expression during the IHC (Figure 2A) and split signals during the FISH (Figure 2B). All cases were negative for *ROS1* and *RET* during the IHC and subsequent FISH analysis.

A comparison of the IMTs' clinicopathological features according to *ALK* rearrangement status is shown in Table 2. Compared to *ALK*-negative IMTs, *ALK*-positive IMTs occurred at a younger age, were mostly located in the lungs, and were more circumscribed (Figure 3). All patients with *ALK*-positive IMTs underwent surgical resection and none of the patients experienced metastasis, recurrence, or death. There were no statistically significant differences in OS or DFS according to *ALK* status. However, *ALK*-positive IMTs tended to have superior OS and DFS (Supplementary Figure 1).

### Results from IHC for PD-L1 and CD8

PD-L1 positivity was observed in 10 of the 22 available cases (45.5%). There were no differences in the clinicopathological features according to the PD-L1

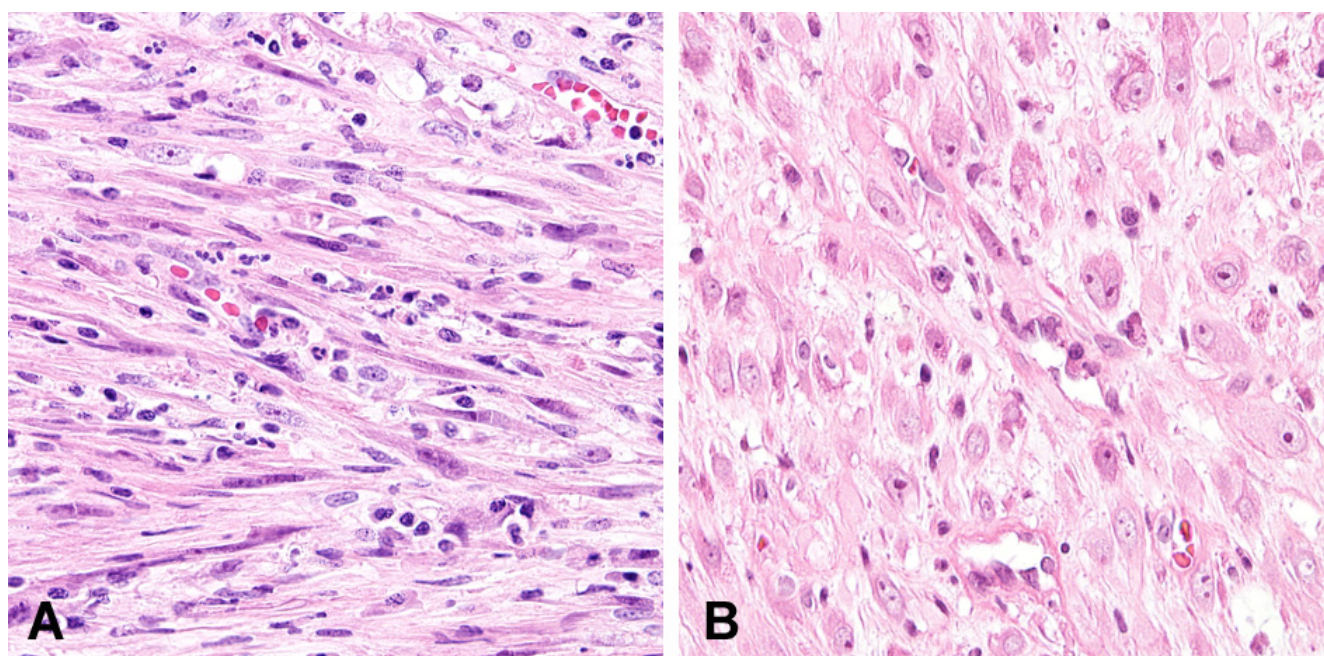

**Figure 1: Nuclear features of inflammatory myofibroblastic tumors.** A. Spindled/elongated cells are arranged in loose fascicles. B. There is a proliferation of plump epithelioid cells with prominent nucleoli that resemble ganglion cells.

**Table 1: Clinicopathological profiles of the 25 patients with inflammatory myofibroblastic tumors**

| Case No. | Age (years) | Sex | Site            | Size (cm)   | ALK IHC | ALK FISH | Recurrence/metastasis                         | Treatment                                     | FU period (mo) | Patient outcome |
|----------|-------------|-----|-----------------|-------------|---------|----------|-----------------------------------------------|-----------------------------------------------|----------------|-----------------|
| 1        | 0           | M   | Mesentery       | 8.7         | +       | +        | No                                            | Surgical resection                            | 52.5           | NED             |
| 2        | 12          | M   | Lung            | 3.5         | +       | +        | No                                            | Surgical resection                            | 69.5           | NED             |
| 3        | 22          | M   | Lung            | 0.6         | +       | +        | No                                            | Surgical resection                            | 108.9          | NED             |
| 4        | 24          | F   | Lung            | 7.5         | +       | +        | No                                            | Surgical resection                            | 53.8           | NED             |
| 5        | 27          | F   | Lung            | 2.7         | +       | +        | No                                            | Surgical resection                            | 21.8           | NED             |
| 6        | 36          | M   | Lung            | 6.0         | +       | +        | No                                            | Surgical resection                            | 6.9            | NED             |
| 7        | 38          | M   | Bladder         | 2.4         | +       | +        | No                                            | Surgical resection                            | 18.2           | NED             |
| 8        | 45          | F   | Lung            | 1.9         | +       | +        | No                                            | Surgical resection                            | 0.9            | NED             |
| 9        | 47          | M   | Lung            | 1.7         | +       | +        | No                                            | Surgical resection                            | 101.2          | NED             |
| 10       | 54          | F   | Stomach         | 1.5         | +       | +        | No                                            | Surgical resection                            |                |                 |
| 11       | 60          | M   | Ureter          | 1.3         | +       | +        | No                                            | Surgical resection                            | 91.5           | NED             |
| 12       | 22          | M   | Mediastinum     | 11.0        | -       | -        | No                                            | Surgical resection                            | 5.6            | DUD             |
| 13       | 28          | F   | Salivary gland  | 1.7         | -       | -        | No                                            | Surgical resection                            | 83.6           | NED             |
| 14       | 40          | M   | Mesentery       | 6.7         | -       | -        | No                                            | Surgical resection                            | 6.2            | NA              |
| 15       | 44          | F   | Kidney          | 5.3         | -       | -        | No                                            | Surgical resection                            | 118.3          | NA              |
| 16       | 49          | M   | Maxillary sinus | 4.2         | -       | -        | Yes                                           | Surgical resection (incomplete)               | 11.9           | DAD             |
| 16a      | 49          | M   | Lung            | Upto 9.5    | -       | -        | Metastasis, multiple (8mo)                    | Surgical resection and CTx                    |                |                 |
| 16b      | 49          | M   | Maxillary sinus | 6.1         | -       | -        | Local recurrence (8mo)                        | Surgical resection (incomplete) and CTx       |                |                 |
| 17       | 49          | F   | Uterus          | 7.8         | -       | -        | No                                            | Surgical resection                            |                |                 |
| 18       | 51          | F   | Kidney          | 2.5         | -       | -        | No                                            | Surgical resection                            | 37.8           | NED             |
| 19       | 55          | M   | Kidney          | 2.5 and 2.3 | -       | -        | Yes                                           | Bx & FU                                       | 17.2           | AWD             |
| 19a      | 55          | M   | Lung            | 3.0         | -       | -        | Metastasis, multiple (synchronously detected) | Surgical resection                            | 17.2           | AWD             |
| 20       | 57          | M   | Mediastinum     | 8.5         | -       | -        | No                                            | Surgical resection                            | 18.5           | NED             |
| 21       | 60          | M   | Lung            | 0.8         | -       | -        | No                                            | Surgical resection                            | 63.3           | NED             |
| 22       | 69          | M   | Retroperitoneum | 13.6        | -       | -        | No                                            | Bx & FU                                       | 27.8           | AWD             |
| 23       | 70          | F   | Maxillary sinus | 4.7         | -       | -        | Local recurrence (1.0 mo)                     | Surgical resection RTx after local recurrence | 35.7           | NA              |
| 24       | 72          | F   | Retroperitoneum | 5.8         | -       | -        | No                                            | Bx & FU                                       | 4.8            | NA              |
| 25       | 76          | F   | Mesentery       | 4.0         | -       | -        | No                                            | Surgical resection                            | 58.7           | NED             |

IHC, immunohistochemical staining; FISH, fluorescent in situ hybridization; mo, month; M, male; F, female; +, positive; -, negative; postop., postoperative; Bx, biopsy; FU, follow-up; CTx, chemotherapy; RTx, radiotherapy; NA, not available; NED, no evidence of disease; AWD, alive with disease; DOD, died of disease; DUD, died of unrelated cause

Case 16 had metastatic (16a) and recurrent (16b) tumors.

Case 19 had synchronously detected lung metastasis (19a).

results. In addition, there were no statistically significant differences in OS or DFS according to PD-L1 status, although PD-L1-positive IMTs tended to have poorer OS and DFS (Supplementary Figure 1). The rate of PD-L1 positivity was not significantly different in the *ALK*-

positive and *ALK*-negative tumors (*ALK*-positive: 36.4% vs. *ALK*-negative: 54.5%,  $P = 0.392$ ) (Table 2). The average proportion of CD8+ TILs was 18.5% among all IMTs. The proportion of CD8+ TILs was slightly higher in PD-L1-positive IMTs, compared to PD-L1-negative IMTs,

**Table 2: Clinicopathological and histological features of primary inflammatory myofibroblastic tumors according to ALK status**

|                                             | ALK (-) (N = 14) | ALK (+) (N = 11) | P - value                 |
|---------------------------------------------|------------------|------------------|---------------------------|
| <b>Clinicopathological parameters</b>       |                  |                  |                           |
| Sex (male) (%)                              | 6 (42.9)         | 7 (63.6)         | 0.302 <sup>1</sup>        |
| Age (years, mean±SD)                        | 53.0±16.1        | 33.2±18.2        | <b>0.008</b> <sup>2</sup> |
| Tumor size (cm, mean±SD)                    | 5.7±3.6          | 3.4±2.7          | 0.106 <sup>2</sup>        |
| Pulmonary location (%)                      | 1 (7.1)          | 7 (63.6)         | <b>0.007</b> <sup>3</sup> |
| Well-defined margins (%)                    | 5 (35.7)         | 9 (81.8)         | <b>0.042</b> <sup>1</sup> |
| Adjuvant treatment (%)                      | 2 (14.3)         | 0 (0.0)          | 0.487 <sup>3</sup>        |
| Death (%)                                   | 1 (7.1)          | 0 (0.0)          | <b>0.043</b> <sup>3</sup> |
| Overall survival (months, mean±SD)          | 35.2±34.5        | 50.7±38.2        | 0.297 <sup>2</sup>        |
| Metastasis/recurrence (%)                   | 3 (21.4)         | 0 (0.0)          | 0.230 <sup>3</sup>        |
| Disease-free survival (months, mean±SD)     | 32.2±36.0        | 50.7±38.2        | 0.227 <sup>2</sup>        |
| <b>Histomorphological parameters</b>        |                  |                  |                           |
| Morphology of myofibroblastic cells         |                  |                  | 0.604 <sup>3</sup>        |
| Spindle (%)                                 | 11 (78.6)        | 10 (90.9)        |                           |
| Plump, epithelioid (%)                      | 3 (21.4)         | 1 (9.1)          |                           |
| Nuclear atypia of myofibroblastic cells (%) | 6 (46.2)         | 5 (45.5)         | 1.000 <sup>3</sup>        |
| Prominent nucleoli (%)                      | 1 (7.1)          | 5 (45.5)         | 0.061 <sup>3</sup>        |
| Necrosis (%)                                | 2 (14.3)         | 3 (27.3)         | 0.623 <sup>3</sup>        |
| PD-L1 positivity                            | 4 (36.4)         | 6 (54.5)         | 0.392 <sup>3</sup>        |
| CD8+ TIL (%)                                | 23.3±17.8        | 8.9±6.7          | <b>0.027</b> <sup>2</sup> |

ALK (-), Negative for *ALK* rearrangement; ALK (+), Positive for *ALK* rearrangement; SD, standard deviation; TIL, tumor infiltrating lymphocytes

<sup>1</sup>Chi-square test, <sup>2</sup>T-test, <sup>3</sup>Fisher's exact test  
Significant values in bold.

although the difference was not significant ( $19.7 \pm 19.0\%$  vs.  $13.1 \pm 10.8\%$ ,  $P = 0.316$ ) (Figure 4A). *ALK*-negative IMTs had more CD8+ TILs, compared to *ALK*-positive IMTs ( $23.3\%$  vs.  $8.9\%$   $P = 0.027$ ) (Figure 4B).

There were four available IMTs from two patients, which included two primary IMTs arising in the maxillary sinus, one local recurrent tumor, and one metastatic lung tumor. These IMTs exhibited significant higher PD-L1 proportions and H-scores in the tumor cells (Figure 5). IMTs with necrosis ( $n = 5$ ) exhibited elevated PD-L1 expression ( $56.0 \pm 51.8\%$  vs.  $15.0 \pm 28.4\%$ ,  $P = 0.029$ ).

## DISCUSSION

The present study evaluated the clinicopathological characteristics of IMTs according to *ALK* status, and its

relationships with PD-L1 expression and CD8+ TILs. We found that patients with metastasis/recurrence exhibited greater PD-L1 expression, and that *ALK*-negative IMTs had more CD8+ TILs, compared to *ALK*-positive tumors.

IMT is now thought to be a true neoplasm with intermediate biologic potential, as *ALK* rearrangement is now observed in approximately 50% of IMTs [2]. In the present study, *ALK* rearrangement was observed in 44.0% of the cases, and *ALK*-positive IMTs occurred in younger patients, compared to *ALK*-negative cases, which is consistent with the findings of previous studies [4, 8, 9]. However, the lungs and the genitourinary tract were the most common sites of *ALK*-positive IMTs in our study, which is slightly different from the findings of previous studies [3, 8, 10]. For example, Western studies have most commonly found *ALK*-positive IMTs in the mesentery and lungs [3, 8], and the abdominal cavity was most common

in a Japanese cohort [10]. This difference may be related to the fact that we only examined Korean patients or a small sample size, and further studies are needed to validate our findings.

Some specific histological features have been reported in lung adenocarcinomas with *ALK* or *ROS1* fusions, such as a mucinous cribriform pattern or solid growth pattern with signet ring cells [11, 12]. However, previous studies have failed to detect an association between histological results and molecular alterations in IMTs [4, 8]. In addition, histological features and *ALK* status have generally been reported to have no effect on

prognosis [8]. We also did not detect any associations between histology or prognosis and *ALK* status, although *ALK*-positive IMTs tended to have a better prognosis. Yamamoto et al. have reported similar findings [10].

Although most IMTs have a relatively benign clinical course, a subset of patients experience local recurrence and metastasis. In these cases, patients with *ALK*-positive IMTs may benefit from treatment using crizotinib (an *ALK* inhibitor) [5]. Unlike patients with *ALK*-positive IMTs, patients with advanced *ALK*-negative tumors have no curative treatment options, and receive conventional palliative chemotherapy or radiotherapy.

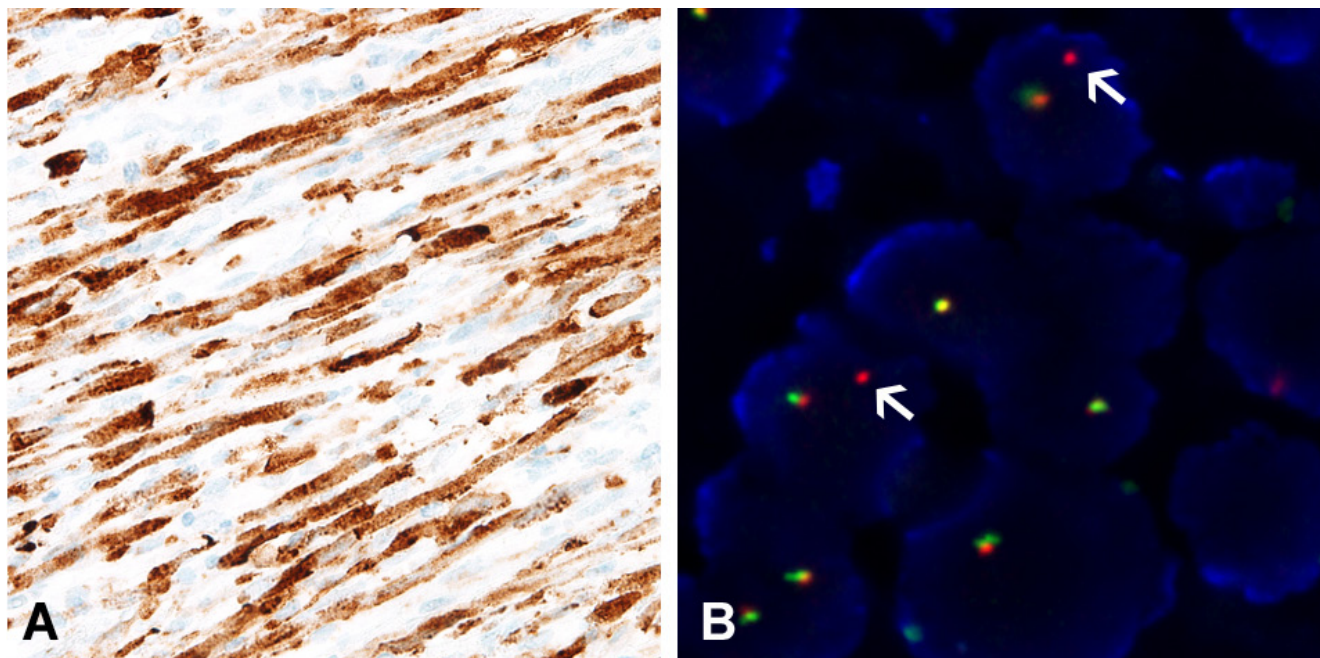

**Figure 2: Confirmation of *ALK* rearrangement using immunohistochemistry and fluorescent *in situ* hybridization analysis.** A. All *ALK*-rearranged inflammatory myofibroblastic tumors display diffusely strong granular cytoplasmic expression of *ALK* during immunohistochemistry. B. Split signals confirm the presence of *ALK* rearrangement.

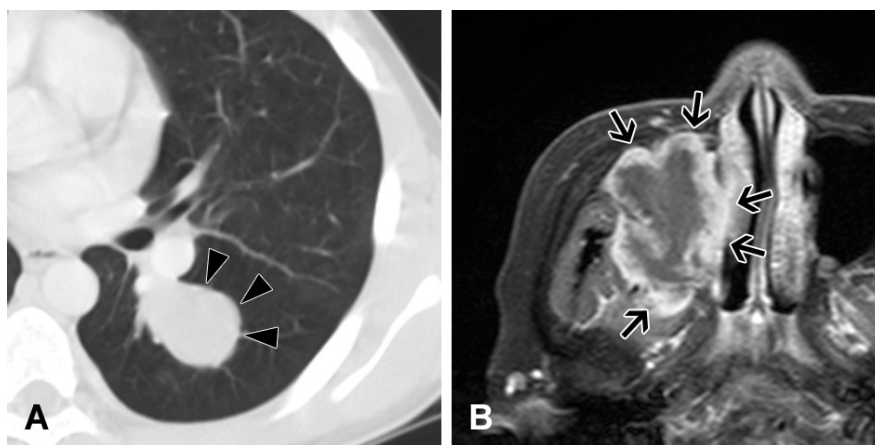

**Figure 3: Imaging of inflammatory myofibroblastic tumors.** A. Chest computed tomography reveals a tumor with smooth and well-defined margins in the lung parenchyma of a 12-year-old boy (Case 2). This tumor is positive for *ALK* rearrangement. B. Head magnetic resonance imaging reveals a lobulated irregular tumor arising in the sinusoidal space of a 70-year-old woman (Case 24). This tumor is negative for *ALK* rearrangement. Resection was incomplete during the first surgery, and the patient experienced local recurrence after 1 month.



positive tumors. Since there may be other explanations for T cell infiltration of the tumor, except mutation burden, further studies are needed to determine what mechanism is involved in T cell infiltration of IMT.

In conclusion, we identified distinct clinicopathological characteristics of IMTs according to

*ALK* status among Korean patients. We also observed that aggressive IMTs had elevated PD-L1 expression and lacked *ALK* rearrangement, which might be useful for selecting patients for immune checkpoint blockade, although a large-scale study is needed to validate these findings.

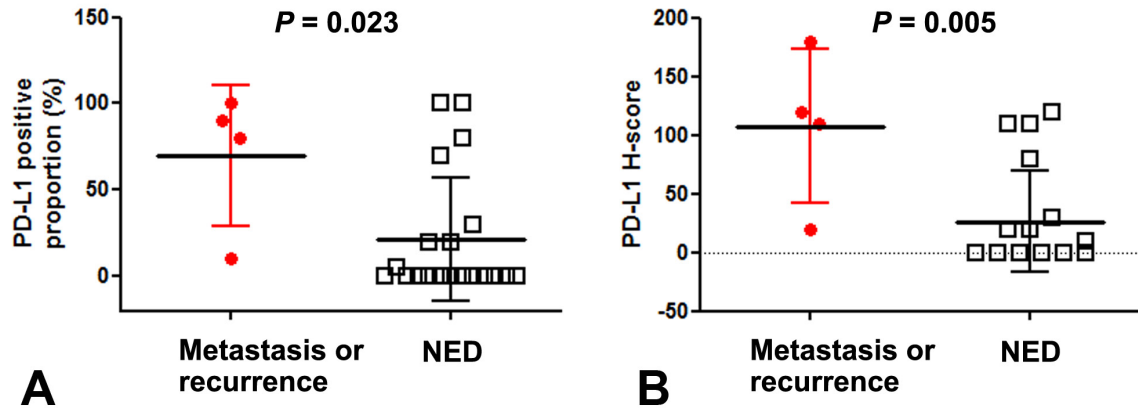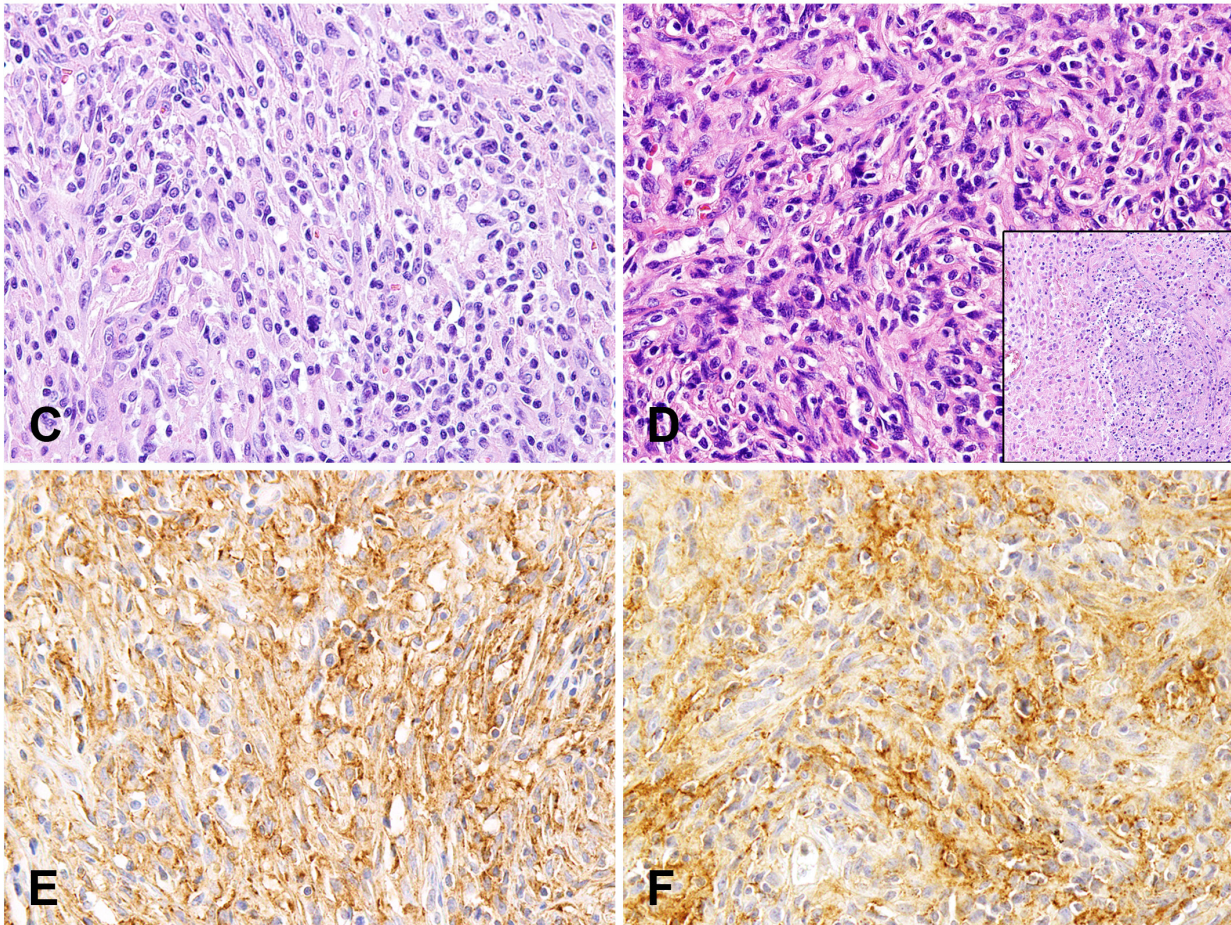

**Figure 5: Higher PD-L1 expression in inflammatory myofibroblastic tumors with metastasis and recurrence.** Inflammatory myofibroblastic tumors (IMTs) with recurrence and metastasis had significantly greater expression of PD-L1 according to proportion **A**, and H-score **B**. **C**. A primary tumor that occurred in the maxilla of a 49-year-old man (Case 16). Lung metastasis developed 5.3 months after the initial diagnosis. **D**. The metastatic lesion has tumor necrosis (inset) and increased tumor cellularity, with more severe nuclear atypia and prominent nucleoli, compared to the primary tumor. Diffuse expression of PD-L1 in primary **E**, and metastatic IMTs **F**. NED: no evidence of disease.

## MATERIALS AND METHODS

This retrospective study was performed with approval of the institutional review board of Severance Hospital (4-2015-1081).

### Case selection

Twenty-eight IMTs from 25 patients were retrieved from our center's pathology files (2005-2015). Twenty-five samples were resected specimens and three samples were biopsied specimens. One patient had a renal IMT with lung metastasis. One patient had one recurrent IMT in maxillary sinus and one metastatic IMT in lung.

The diagnosis of IMT was based on the morphological features and pathological criteria from the World Health Organization (WHO) classification of soft tissue tumors, as well as results from immunohistochemistry (IHC) and fluorescent *in situ* hybridization (FISH) [1]. Histologically, IMTs are composed of myofibroblastic and fibroblastic spindle cells with varying proportions of inflammatory infiltrate. Thus, we carefully excluded other possible spindle cell lesions, such as IgG4-related disease, spindle cell carcinoma, and dedifferentiated liposarcoma with IMT-like features [28]. We comprehensively examined the patients' clinical features and performed IgG4 and IgG IHC to exclude IgG4-related disease in cases with fibrosis and extensive plasma cell infiltration. Spindle cell carcinoma was excluded based on the results of cytokeratin IHC and precise histological examination. In cases of dedifferentiated liposarcoma with IMT-like features, thorough specimen sampling and histological identification of well-differentiated liposarcoma areas were performed.

### Clinicopathological analysis

The following clinicopathological parameters were recorded: age at diagnosis, sex, anatomical location, tumor size, tumor characteristics, treatment modality, date of death, metastasis, recurrence, overall survival (OS), and disease-free survival (DFS). Whole tumor sections from each case were reviewed by two experienced pathologists (YJC and HSS). Based on a previous report [1], the shape of the tumor cells was separately evaluated (spindle/elongated *vs.* plump epithelioid, Figure 1) before assessing nuclear atypia, nucleolar prominence, and the presence of necrosis.

### Tissue microarray

Based on a retrospective review of the hematoxylin and eosin-stained slides, the most appropriate formalin-

fixed paraffin-embedded tumor tissue samples were retrieved and representative tumor areas were circled. Two 3.0-mm tissue cores were obtained from the circled area of each paraffin block, and the cores were inserted into 6 × 5 blocks.

### Immunohistochemistry and fluorescent *in situ* hybridization for *ALK*, *ROS1*, and *RET*

IHC was performed using tissue microarray slides and antibodies against anaplastic lymphoma kinase (ALK; D5F3, 1:50; Cell Signaling Technology, Danvers, MA, USA), ROS1 (D4D6, 1:50; Cell Signaling), and RET (C-19, 1:100; Santa Cruz Biotechnology, Santa Cruz, CA, USA). The IHC results were obtained using the OptiView Detection Kit (Ventana Medical System, Tucson, AZ, USA). All cases were reviewed by two experienced pathologists (YJC and HSS). All cases were further analyzed to confirm rearrangement of *ALK*, *ROS1*, and/or *RET* using FISH and a break-apart probe for *ALK* (Abbott Molecular, Abbot Park, IL, USA), a *ROS1* probe (Abbott Molecular), and a *RET* probe (ZytoVision, Bremerhaven, Germany) [29].

### Immunohistochemistry for PD-L1 and CD8

IHC was performed using whole-tissue slides and antibodies against PD-L1 (SP263, rabbit monoclonal primary antibody; Ventana Medical System) and CD8 (C8/144B, ready-to-use monoclonal mouse antibody, Agilent Technologies, Santa Clara, CA, USA). The IHC results were obtained using the OptiView Detection Kit (Ventana Medical System) and the UltraView Detection Kit (Ventana Medical System), respectively. The PD-L1 IHC results were interpreted according to the methods of previous studies, and positive results were defined as ≥1% of tumor cells with membranous staining [30, 31]. In addition to the proportion of PD-L1 positivity, the H-score was calculated for the PD-L1 staining. This score is calculated by multiplying the intensity value (0, 1, 2, or 3) by the extent of each staining intensity (%). The proportion of intratumoral CD8+ TILs was also recorded [31-33]. Necrotic areas were excluded from the scoring.

### Statistical analysis

Data were reported as number and percentage or mean ± standard deviation. The analyses evaluated PD-L1 expression, CD8+ TILs, clinicopathological parameters, and *ALK* status. The chi-square test and Fisher's exact test were used for categorical parameters, and the *t*-test was used for continuous parameters. OS and DFS were evaluated using the Kaplan-Meier method and the log-rank test. Statistical analyses were performed using IBM



SPSS software (version 19.0; IBM Corp., Armonk, NY), and *P*-values of < 0.05 were considered statistically significant.

## CONFLICTS OF INTEREST

None.

## FUNDING

This research was supported by the Basic Science Research Program through the National Research Foundation of Korea (NRF), which is funded by the Ministry of Science, ICT & Future Planning (NRF-2015R1C1A1A01051935).

## REFERENCES

1. Fletcher CDM, International Agency for Research on C. (2013). WHO classification of tumours of Soft Tissue and Bone. (Lyon: International Agency for Research on Cancer (IARC)).
2. Griffin CA, Hawkins AL, Dvorak C, Henkle C, Ellingham T, Perlman EJ. Recurrent involvement of 2p23 in inflammatory myofibroblastic tumors. *Cancer Res.* 1999; 59: 2776-80.
3. Lovly CM, Gupta A, Lipson D, Otto G, Brennan T, Chung CT, Borinstein SC, Ross JS, Stephens PJ, Miller VA, Coffin CM. Inflammatory myofibroblastic tumors harbor multiple potentially actionable kinase fusions. *Cancer Discov.* 2014; 4:889-95. doi: 10.1158/2159-8290.cd-14-0377.
4. Antonescu CR, Suurmeijer AJ, Zhang L, Sung YS, Jungbluth AA, Travis WD, Al-Ahmadie H, Fletcher CD, Alaggio R. Molecular Characterization of Inflammatory Myofibroblastic Tumors With Frequent ALK and ROS1 Gene Fusions and Rare Novel RET Rearrangement. *Am J Surg Pathol.* 2015; 39:957-67. doi: 10.1097/PAS.0000000000000404.
5. Butrynski JE, D'Adamo DR, Hornick JL, Dal Cin P, Antonescu CR, Jhanwar SC, Ladanyi M, Capelletti M, Rodig SJ, Ramaiya N, Kwak EL, Clark JW, Wilner KD, et al. Crizotinib in ALK-rearranged inflammatory myofibroblastic tumor. *N Engl J Med.* 2010; 363:1727-33. doi: 10.1056/NEJMoa1007056.
6. Hodi FS, O'Day SJ, McDermott DF, Weber RW, Sosman JA, Haanen JB, Gonzalez R, Robert C, Schadendorf D, Hassel JC, Akerley W, van den Eertwegh AJ, Lutzky J, et al. Improved survival with ipilimumab in patients with metastatic melanoma. *N Engl J Med.* 2010; 363:711-23. doi: 10.1056/NEJMoa1003466.
7. Ansell SM, Lesokhin AM, Borrello I, Halwani A, Scott EC, Gutierrez M, Schuster SJ, Millenson MM, Cattray D, Freeman GJ, Rodig SJ, Chapuy B, Ligon AH, et al. PD-1 blockade with nivolumab in relapsed or refractory Hodgkin's lymphoma. *N Engl J Med.* 2015; 372:311-9. doi: 10.1056/NEJMoa1411087.
8. Coffin CM, Hornick JL, Fletcher CD. Inflammatory myofibroblastic tumor: comparison of clinicopathologic, histologic, and immunohistochemical features including ALK expression in atypical and aggressive cases. *Am J Surg Pathol.* 2007; 31:509-20. doi: 10.1097/01.pas.0000213393.57322.c7.
9. Chan JK, Cheuk W, Shimizu M. Anaplastic lymphoma kinase expression in inflammatory pseudotumors. *Am J Surg Pathol.* 2001; 25:761-8. doi:
10. Yamamoto H, Yoshida A, Taguchi K, Kohashi K, Hatanaka Y, Yamashita A, Mori D, Oda Y. ALK, ROS1 and NTRK3 gene rearrangements in inflammatory myofibroblastic tumors. *Histopathology.* 2015. doi: 10.1111/his.12910.
11. Rodig SJ, Mino-Kenudson M, Dacic S, Yeap BY, Shaw A, Barletta JA, Stubbs H, Law K, Lindeman N, Mark E, Janne PA, Lynch T, Johnson BE, et al. Unique clinicopathologic features characterize ALK-rearranged lung adenocarcinoma in the western population. *Clin Cancer Res.* 2009; 15:5216-23. doi: 10.1158/1078-0432.CCR-09-0802.
12. Lee SE, Lee B, Hong M, Song JY, Jung K, Lira ME, Mao M, Han J, Kim J, Choi YL. Comprehensive analysis of RET and ROS1 rearrangement in lung adenocarcinoma. *Mod Pathol.* 2015; 28:468-79. doi: 10.1038/modpathol.2014.107.
13. Garon EB, Rizvi NA, Hui R, Leigh N, Balmanoukian AS, Eder JP, Patnaik A, Aggarwal C, Gubens M, Horn L, Carcereny E, Ahn MJ, Felip E, et al. Pembrolizumab for the treatment of non-small-cell lung cancer. *N Engl J Med.* 2015; 372:2018-28. doi: 10.1056/NEJMoa1501824.
14. Hellmann MD, Rizvi NA, Goldman JW, Gettinger SN, Borghaei H, Brahmer JR, Ready NE, Gerber DE, Chow LQ, Jurgens RA, Shepherd FA, Laurie SA, Geese WJ, et al. Nivolumab plus ipilimumab as first-line treatment for advanced non-small-cell lung cancer (CheckMate 012): results of an open-label, phase 1, multicohort study. *Lancet Oncol.* 2017; 18:31-41. doi: 10.1016/s1470-2045(16)30624-6.
15. Robert C, Schachter J, Long GV, Arance A, Grob JJ, Mortier L, Daud A, Carlino MS, McNeil C, Lotem M, Larkin J, Lorigan P, Neyns B, et al. Pembrolizumab versus ipilimumab in Advanced Melanoma. *N Engl J Med.* 2015; 372:2521-32. doi: 10.1056/NEJMoa1503093.
16. Seiwert TY, Burtneess B, Mehra R, Weiss J, Berger R, Eder JP, Heath K, McClanahan T, Lunceford J, Gause C, Cheng JD, Chow LQ. Safety and clinical activity of pembrolizumab for treatment of recurrent or metastatic squamous cell carcinoma of the head and neck (KEYNOTE-012): an open-label, multicentre, phase 1b trial. *Lancet Oncol.* 2016; 17:956-65. doi: 10.1016/S1470-2045(16)30066-3.
17. Schumacher TN, Schreiber RD. Neoantigens in cancer immunotherapy. *Science.* 2015; 348:69-74. doi: 10.1126/science.aaa4971.
18. Lizotte PH, Ivanova EV, Awad MM, Jones RE, Keogh

- L, Liu H, Dries R, Almonte C, Herter-Sprie GS, Santos A, Feeney NB, Paweletz CP, Kulkarni MM, et al. Multiparametric profiling of non-small-cell lung cancers reveals distinct immunophenotypes. *JCI Insight*. 2016; 1:e89014. doi: 10.1172/jci.insight.89014.
19. Tumeh PC, Harview CL, Yearley JH, Shintaku IP, Taylor EJ, Robert L, Chmielowski B, Spasic M, Henry G, Ciobanu V, West AN, Carmona M, Kivork C, et al. PD-1 blockade induces responses by inhibiting adaptive immune resistance. *Nature*. 2014; 515:568-71. doi: 10.1038/nature13954.
  20. Yadav M, Jhunjhunwala S, Phung QT, Lupardus P, Tanguay J, Bumbaca S, Franci C, Cheung TK, Fritsche J, Weinschenk T, Modrusan Z, Mellman I, Lill JR, et al. Predicting immunogenic tumour mutations by combining mass spectrometry and exome sequencing. *Nature*. 2014; 515:572-6. doi: 10.1038/nature14001.
  21. Teng MW, Ngiew SF, Ribas A, Smyth MJ. Classifying Cancers Based on T-cell Infiltration and PD-L1. *Cancer Res*. 2015; 75: 2139-45. doi: 10.1158/0008-5472.CAN-15-0255.
  22. Denkert C, Loibl S, Noske A, Roller M, Muller BM, Komor M, Budczies J, Darb-Esfahani S, Kronenwett R, Hanusch C, von Tonne C, Weichert W, Engels K, et al. Tumor-associated lymphocytes as an independent predictor of response to neoadjuvant chemotherapy in breast cancer. *J Clin Oncol*. 2010; 28:105-13. doi: 10.1200/jco.2009.23.7370.
  23. Nosho K, Baba Y, Tanaka N, Shima K, Hayashi M, Meyerhardt JA, Giovannucci E, Dranoff G, Fuchs CS, Ogino S. Tumour-infiltrating T-cell subsets, molecular changes in colorectal cancer, and prognosis: cohort study and literature review. *J Pathol*. 2010; 222:350-66. doi: 10.1002/path.2774.
  24. Varn FS, Wang Y, Mullins DW, Fiering S, Cheng C. Systematic Pan-Cancer Analysis Reveals Immune Cell Interactions in the Tumor Microenvironment. *Cancer Res*. 2017; 77:1271-82. doi: 10.1158/0008-5472.can-16-2490.
  25. Brown SD, Warren RL, Gibb EA, Martin SD, Spinelli JJ, Nelson BH, Holt RA. Neo-antigens predicted by tumor genome meta-analysis correlate with increased patient survival. *Genome Res*. 2014; 24:743-50. doi: 10.1101/gr.165985.113.
  26. Rizvi NA, Hellmann MD, Snyder A, Kvistborg P, Makarov V, Havel JJ, Lee W, Yuan J, Wong P, Ho TS, Miller ML, Rekhtman N, Moreira AL, et al. Mutational landscape determines sensitivity to PD-1 blockade in non-small cell lung cancer. *Science*. 2015; 348:124-8. doi: 10.1126/science.aaa1348.
  27. McGranahan N, Furness AJ, Rosenthal R, Ramskov S, Lyngaa R, Saini SK, Jamal-Hanjani M, Wilson GA, Birkbak NJ, Hiley CT, Watkins TB, Shafi S, Murugaesu N, et al. Clonal neoantigens elicit T cell immunoreactivity and sensitivity to immune checkpoint blockade. *Science*. 2016; 351:1463-9. doi: 10.1126/science.aaf1490.
  28. Yamamoto H, Yamaguchi H, Aishima S, Oda Y, Kohashi K, Oshiro Y, Tsuneyoshi M. Inflammatory myofibroblastic tumor versus IgG4-related sclerosing disease and inflammatory pseudotumor: a comparative clinicopathologic study. *Am J Surg Pathol*. 2009; 33:1330-40. doi:
  29. Cha YJ, Lee JS, Kim HR, Lim SM, Cho BC, Lee CY, Shim HS. Screening of ROS1 Rearrangements in Lung Adenocarcinoma by Immunohistochemistry and Comparison with ALK Rearrangements. *PLoS One*. 2014; 9:e103333. doi: 10.1371/journal.pone.0103333.
  30. Borghaei H, Paz-Ares L, Horn L, Spigel DR, Steins M, Ready NE, Chow LQ, Vokes EE, Felip E, Holgado E, Barlesi F, Kohlhaufl M, Arrieta O, et al. Nivolumab versus Docetaxel in Advanced Nonsquamous Non-Small-Cell Lung Cancer. *N Engl J Med*. 2015; 373:1627-39. doi: 10.1056/NEJMoal507643.
  31. Topalian SL, Hodi FS, Brahmer JR, Gettinger SN, Smith DC, McDermott DF, Powderly JD, Carvajal RD, Sosman JA, Atkins MB, Leming PD, Spigel DR, Antonia SJ, et al. Safety, activity, and immune correlates of anti-PD-1 antibody in cancer. *N Engl J Med*. 2012; 366:2443-54. doi: 10.1056/NEJMoal200690.
  32. Herbst RS, Soria JC, Kowanzet M, Fine GD, Hamid O, Gordon MS, Sosman JA, McDermott DF, Powderly JD, Gettinger SN, Kohrt HE, Horn L, Lawrence DP, et al. Predictive correlates of response to the anti-PD-L1 antibody MPDL3280A in cancer patients. *Nature*. 2014; 515:563-7. doi: 10.1038/nature14011.
  33. Scheel AH, Dietel M, Heukamp LC, Johrens K, Kirchner T, Reu S, Ruschoff J, Schildhaus HU, Schirmacher P, Tiemann M, Warth A, Weichert W, Fischer RN, et al. Harmonized PD-L1 immunohistochemistry for pulmonary squamous-cell and adenocarcinomas. *Mod Pathol*. 2016; 29:1165-72. doi: 10.1038/modpathol.2016.117.
